# Supplementary material for: Polycyclic Guanidine Alkaloids from Poecilosclerida Marine Sponges
Source: MDPI journal article supplement (doi:10.3390/md14040077), 2016-04-09
Supplement: s1 [file s1]

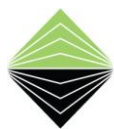

Daniel Coaten  
Keilir Institute of Technology  
Tel: +354 578 4082  
Email: daniel@keilir.net

MDPI AG  
*Marine Drugs* Editorial Office  
Klybeckstrasse 64,  
4057 Basel,  
Switzerland

25/03/16

**Re:** Letter of confirmation.

To whom it may concern.

Dear Sir/Madam,

Through my capacity as native English speaker and senior lecturer of English composition and technical writing courses based at Keilir Institute of Technology (validated by the University of Iceland), I hereby confirm that I have read through the latest version of the manuscript entitled "Polycyclic Guanidine Alkaloids from Poecilosclerida Marine Sponges" (updated on the 25/03/2016).

To the best of my knowledge, I found that the written English, grammar and style contained within this document to be of a satisfactory level for which it is intended.

Yours faithfully,

Daniel Coaten  
Assistant Professor
